# Supplementary material for: Characterization of Antibiotic Resistance Gene Abundance and Microbiota Composition in Feces of Organic and Conventional Pigs from Four EU Countries
Source: PubMed Central journal article supplement (PMC4517930; doi:10.1371/journal.pone.0132892), 2015-07-28
Supplement: pone.0132892.s001.pdf [file pone.0132892.s001.pdf]

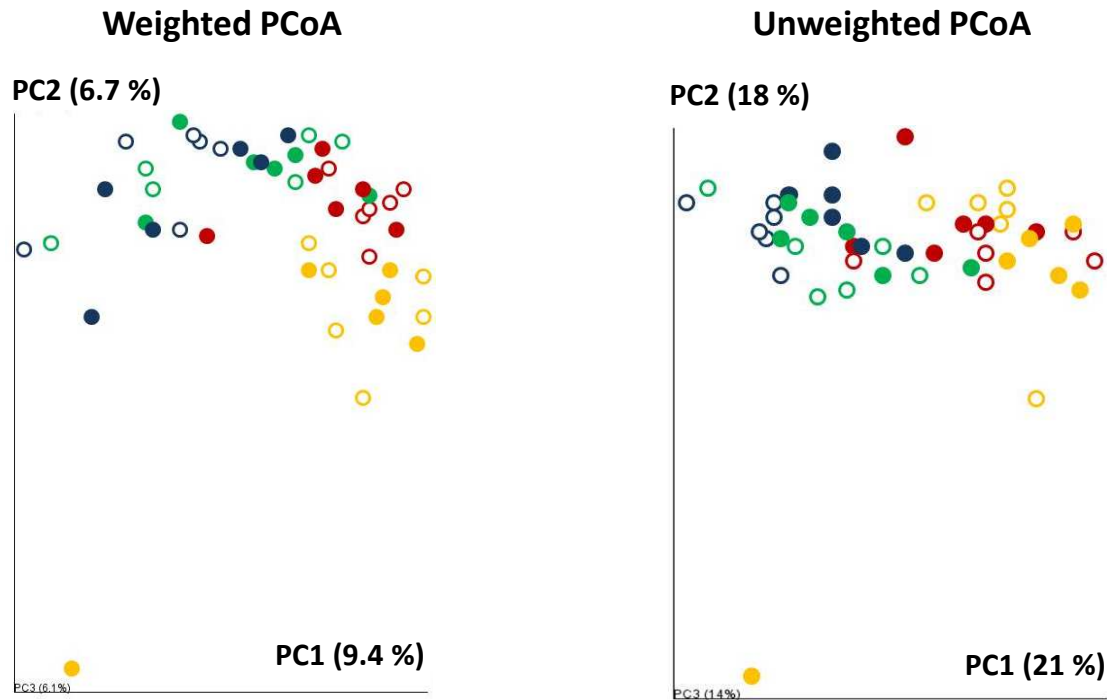

**S1 Figure.** Weighted and unweighted PCoA plots based on 16S rRNA gene sequencing of selected samples. No differences based on the country of sample origin or farming conditions were observed. Orange - samples from Italian farms, red - samples from French farms, blue - samples from Danish farms, green - samples from Swedish farms. Opened symbols – samples from pigs kept in conventional farms. Closed symbols – samples from pigs kept in organic farms. Mind quite low PC1 values in both weighted and unweighted PCoA.
